# Supplementary material
Source: PubMed Central journal article supplement (PMC4752254)
Supplement: NIHMS757783-supplement-Supplementary_information.pdf [file NIHMS757783-supplement-Supplementary_information.pdf]

## **Supplementary Information**

### **Inhibition of mechanical allodynia in neuropathic pain by TLR5-mediated A-fiber blockade**

Zhen-Zhong Xu, Yong-Ho Kim, Sangsu Bang, Yi Zhang, Temugin Berta,  
Fan Wang, Seog-Bae Oh, & Ru-Rong Ji

Supplementary Table: 1

Supplemental Figures: 12

**Supplementary Table 1.** Mouse sequences of *Tlr* primers used for quantitative RT-PCR.

List of primer sequences designed for quantitative real-time RT-PCR.

|              | Forward primers             | Reverse primers        | Accession No. |
|--------------|-----------------------------|------------------------|---------------|
| <i>Gapdh</i> | TTGATGGCAACAATCTCCAC        | CGTCCCGTAGACAAAATGGT   | NM_001001303  |
| <i>Tlr1</i>  | ATGTGAGCTGAGGGACTTTG        | GGATAGTGGAGACATGTGGAAG | NM_030682     |
| <i>Tlr2</i>  | ACCAAGATCCAGAAGAGCCA        | CATCACCGGTCAGAAAACAA   | NM_011905     |
| <i>Tlr3</i>  | GCGTTGCGAAGTGAAGAACT        | TTCAAGAGGAGGGCGAATAA   | NM_126166     |
| <i>Tlr4</i>  | TTCAGAACTTCAGTGGCTGG        | TGTTAGTCCAGAGAACTTCCTG | NM_021297     |
| <i>Tlr5</i>  | GCAGGATCATGGCATGTCAAC       | ATCTGGGTGAGGTTACAGCCT  | NM_016928     |
| <i>Tlr6</i>  | CCAAGAACAAAAGCCCTGAG        | TGTTTTGCAACCGATTGTGT   | NM_011604     |
| <i>Tlr7</i>  | GATGTCCTTGGCTCCCTTC         | TTTGTCTCTCCGTGTCCAC    | NM_133211     |
| <i>Tlr8</i>  | CGTTTTACCTTCCTTTGTCTATAGAAC | CGTCACAAGGATAGCTTCTGG  | NM_133212     |
| <i>Tlr9</i>  | AACCGCCACTTCTATAACCAG       | GTAAGACAGAGCAAGGCAGG   | NM_031178     |
| <i>Tlr11</i> | CAGGCTGGGATTGCTCATC         | CCAGTCAAGGTAAGGCTCAC   | NM_205819     |
| <i>Tlr12</i> | GCTCTGATTCTCTGGTGTAG        | AGAATGTGAAATAGCGGGAGAC | NM_205823     |
| <i>Tlr13</i> | GGAGCGCCTTGATCTAACTAACA     | TCAGGTGGGTCAGAGAAACCA  | NM_205820     |

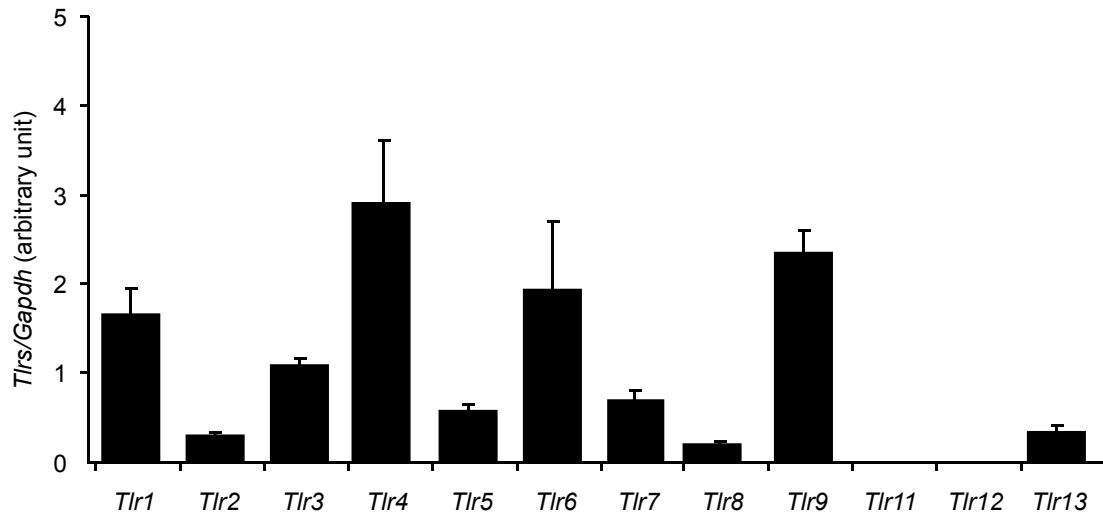

**Supplementary Fig. 1.** Quantitative RT-PCR analysis shows relative expression of *Tlr* mRNAs in mouse DRG tissues. The values are normalized to GAPDH.  $n = 3-4$  mice/group. All data were expressed as mean  $\pm$  s.e.m

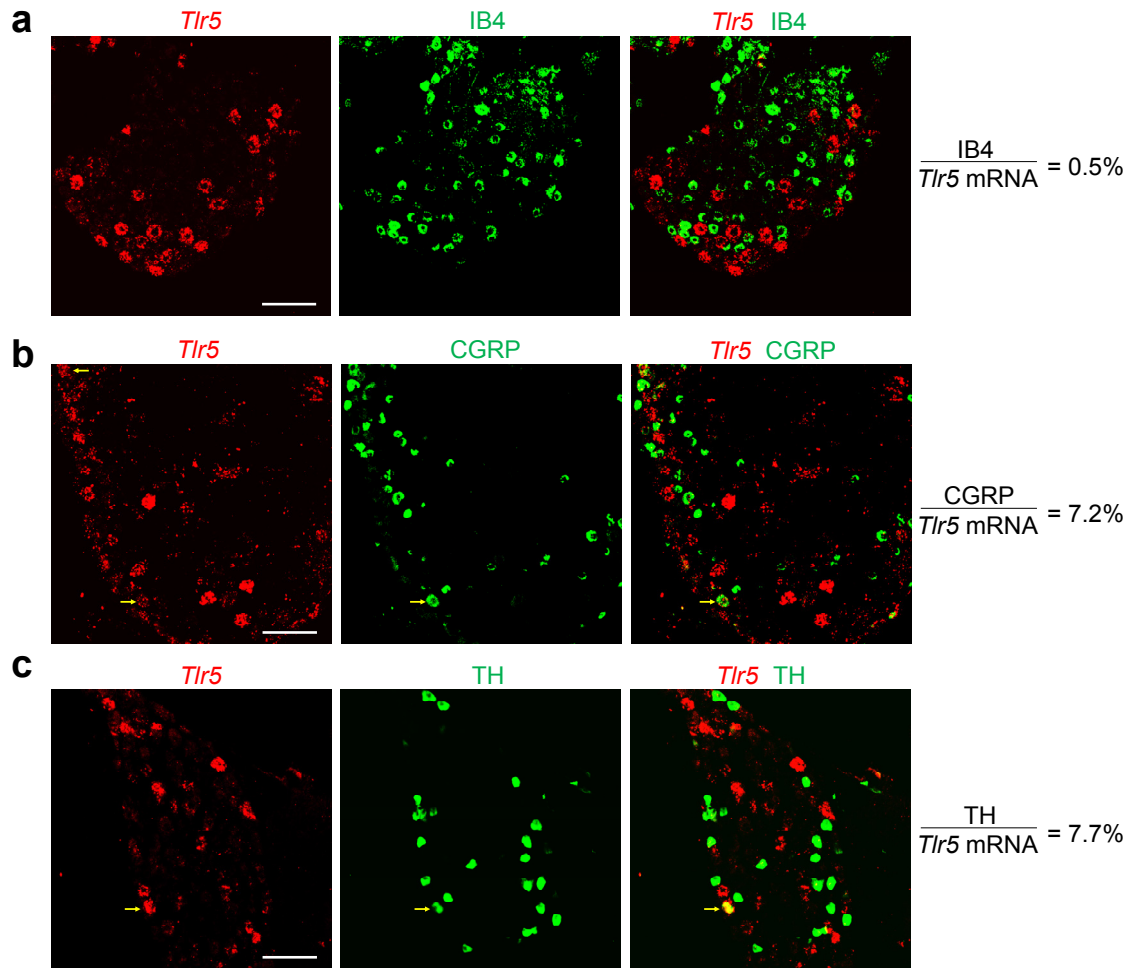

**Supplementary Fig. 2.** Co-expression of *Tlr5* mRNA with IB4 (a), CGRP (b), and TH (c) in mouse DRG neurons. *Tlr5* mRNA expression was revealed by in situ hybridization. Within the *Tlr5* population, 7.2% of DRG neurons express CGRP and 7.7% of DRG neurons express tyrosine hydroxylase (TH), but only 0.5% of DRG neurons bind IB4. Scale, 100  $\mu\text{m}$ . 4-5 DRG sections per mouse and 3 mice per group were used for percentage quantification.

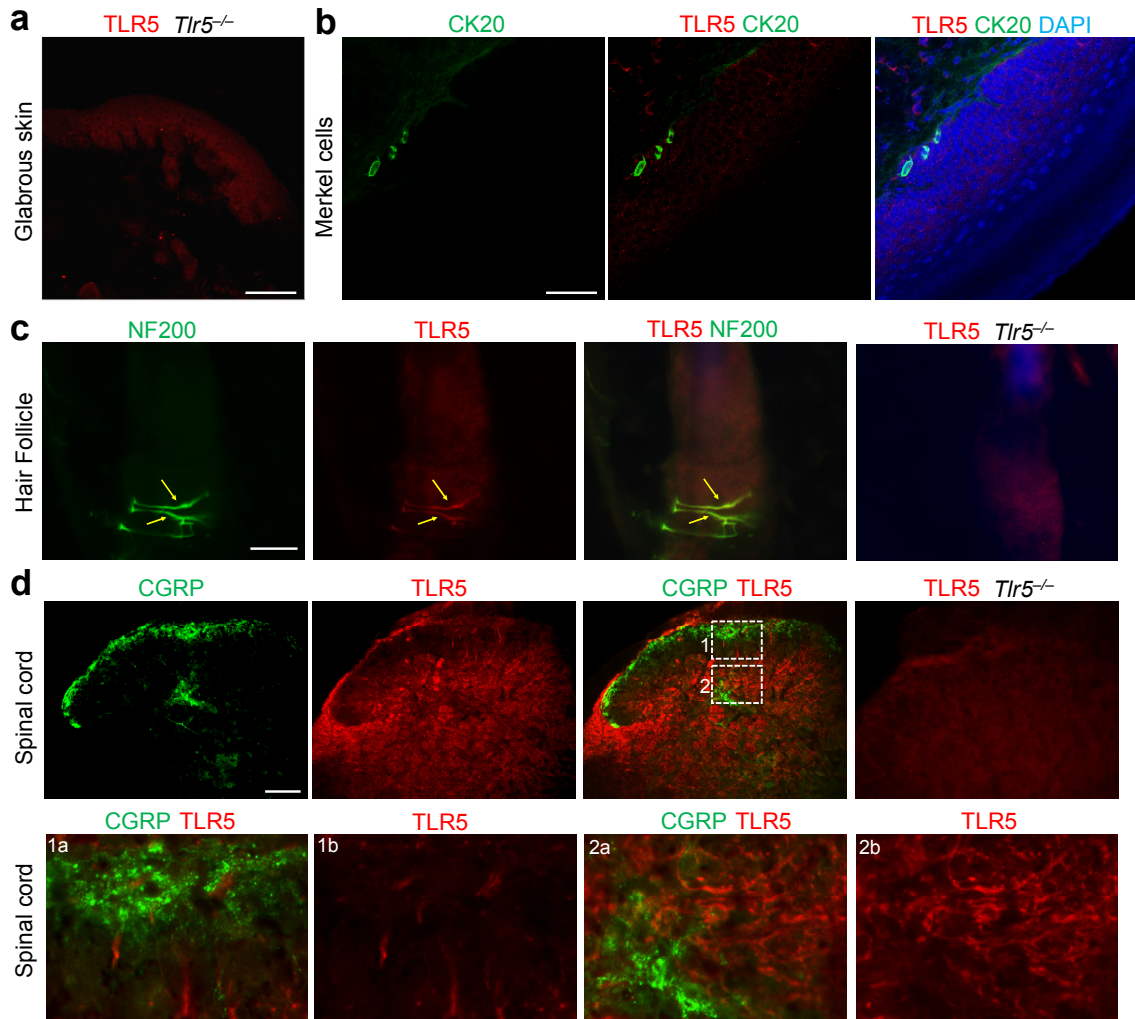

**Supplementary Fig. 3.** TLR5 expression in skin and spinal cord of WT and *Tlr5*<sup>-/-</sup> mice. (a) TLR5 immunostaining is absent in glabrous skin of *Tlr5*<sup>-/-</sup> mice. (b) Double staining of TLR5 and CK20, a marker for Merkel cells, in hindpaw skin. Note there is no TLR5 staining around Merkel cells. Scale, 100  $\mu$ m. The skin morphology was revealed by DAPI nuclear staining. (c) Double staining of TLR5 and NF200 in hairy skin of WT and *Tlr5*<sup>-/-</sup> mice. TLR5-IR is present in nerve fibers surrounding the base of hair follicle. Yellow arrows indicate double-labeled nerve fibers. TLR5 staining is absent in *Tlr5*<sup>-/-</sup> mice. Scale, 20  $\mu$ m. (d) Double immunostaining of TLR5 and CGRP in spinal cord dorsal horn. Box-1 and Box-2 in the dorsal horn are enlarged in low panels. 1a and 2a are merged images, and 1b and 2b are TLR5 single staining images. Note there is no obvious co-localization of TLR5 and CGRP in spinal cord axons and axonal terminals. Scale, 100  $\mu$ m.

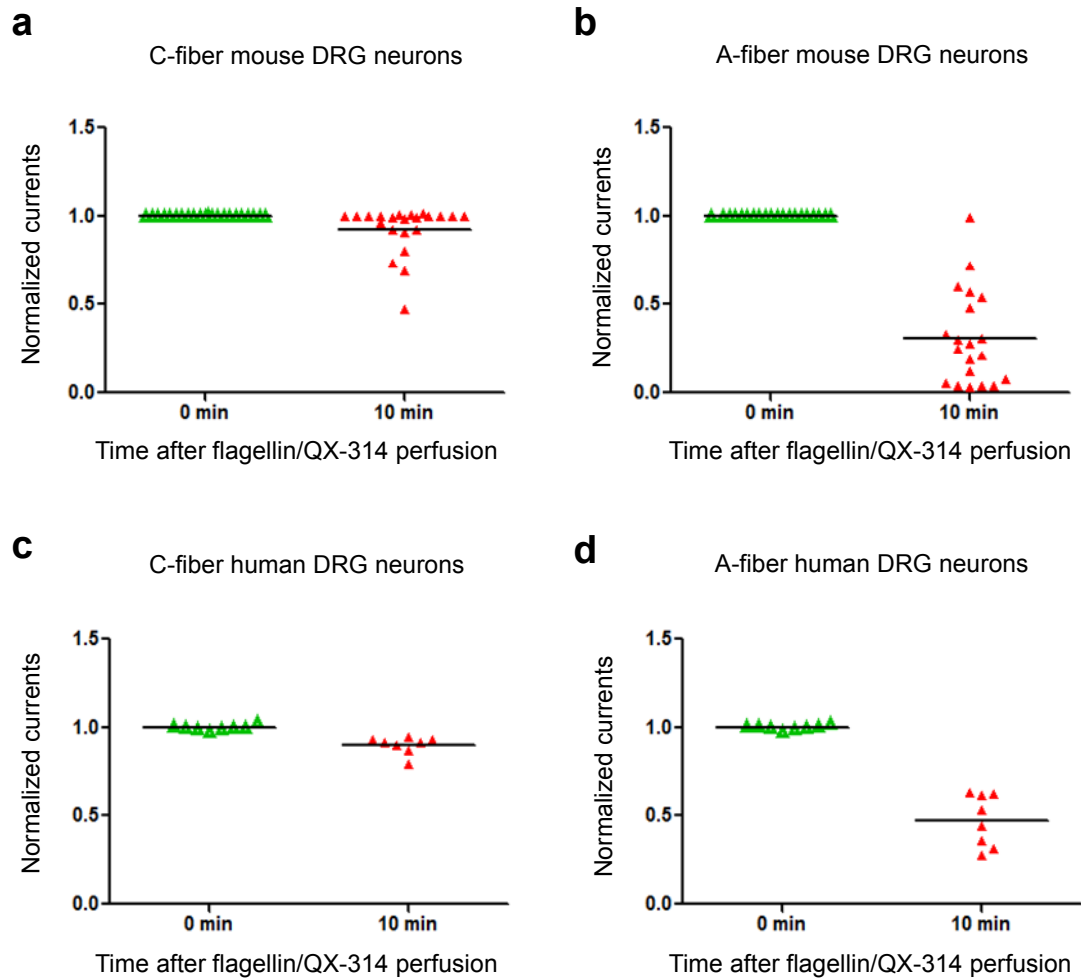

**Supplementary Fig. 4.** Summary of mouse and human DRG neurons' responses to A-fiber blockade. **(a)** C-fiber and **(b)** A-fiber DRG neurons' responses to A-fiber blockade (0.3 nM flagellin and 5 mM QX-314) in mice.  $n = 22$  neurons for C-fibers and  $n = 20$  neurons for A-fibers. Y-axis shows normalized sodium currents (amplitude, normalized to the baseline) at 0 min and 10 min after QX-314/flagellin treatment. Note a marked reduction in currents in A-fiber neurons (30-55  $\mu\text{m}$ ). A few C-fiber (10-25  $\mu\text{m}$ ) neurons also display moderate inhibition. **(c)** C-fiber and **(d)** A-fiber human DRG neurons' responses to A-fiber blockade (0.9 nM flagellin and 12 mM QX-314).  $n = 8$  neurons per group.

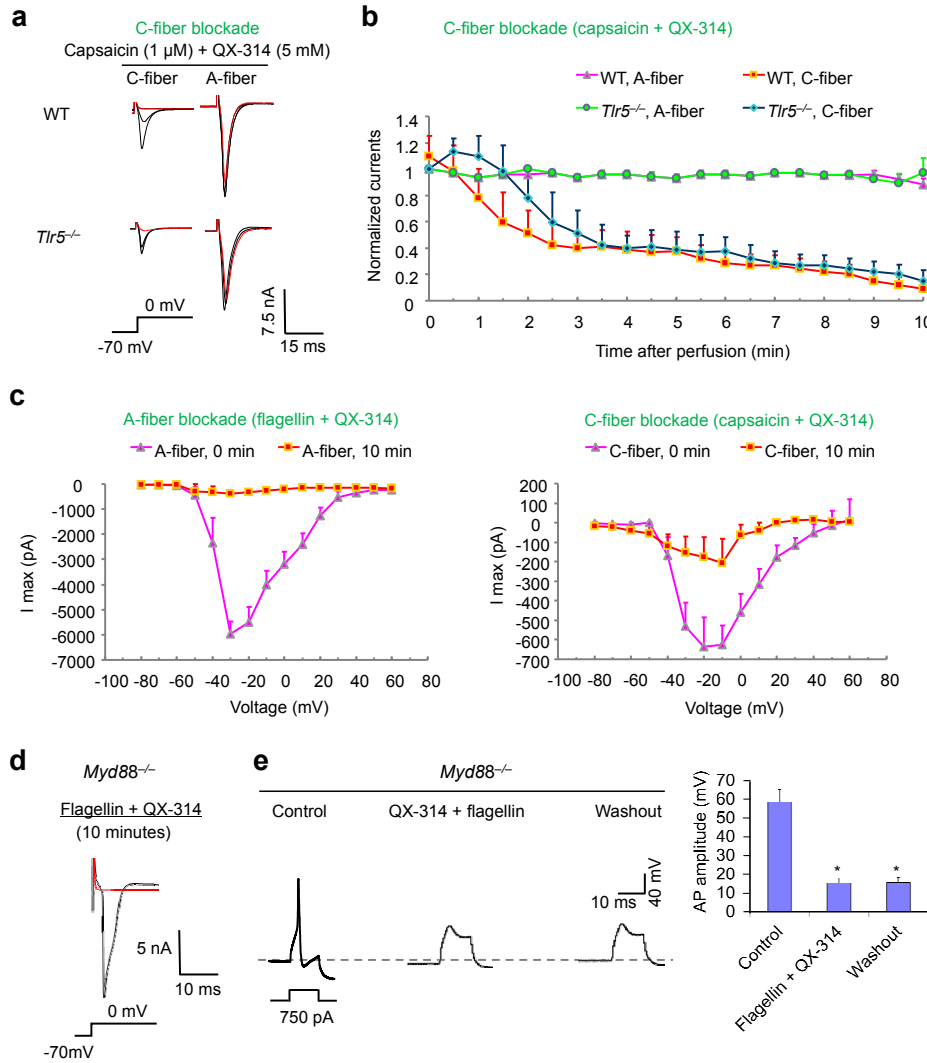

**Supplementary Fig. 5.** Effects of C-fiber blockade on sodium currents in small C-fiber and large A-fiber DRG neurons in WT and *Tlr5*<sup>-/-</sup> mice and effects of A-fiber blockade in *Myd88*<sup>-/-</sup> mice. **(a)** Traces of transient sodium currents in C- and A-fiber neurons of WT and *Tlr5*<sup>-/-</sup> mice, before and after C-fiber blockade (1  $\mu$ M capsaicin / 5 mM QX-314). **(b)** Time course of sodium currents in C- and A-fiber neurons after C-fiber blockade. C-fiber blockade via capsaicin/QX-314 suppresses sodium currents and action potentials in small C-fiber but not large A-fiber DRG neurons. Note that the effect of C-fiber blockade is not affected in *Tlr5*-deficient neurons. \* $P < 0.05$ , two-way ANOVA.  $n = 10$  neurons/group. **(c)** I/V curves of A-fiber blockade and C-fiber blockade. **(d)** Traces of transient sodium currents in A-fiber neurons of *Myd88*<sup>-/-</sup> mice before and after flagellin/QX-314 (A-fiber blockade). **(e)** Traces of action potentials in A-fiber neurons of *Myd88*<sup>-/-</sup> mice before and during flagellin/QX-314 treatment and after washout. Right, amplitude of action potentials. Note that A-fiber blockade retains its efficacy in *Myd88*<sup>-/-</sup> mice. \* $P < 0.05$ , vs. control,  $n = 10$  neurons/group. All data were expressed as mean  $\pm$  s.e.m.

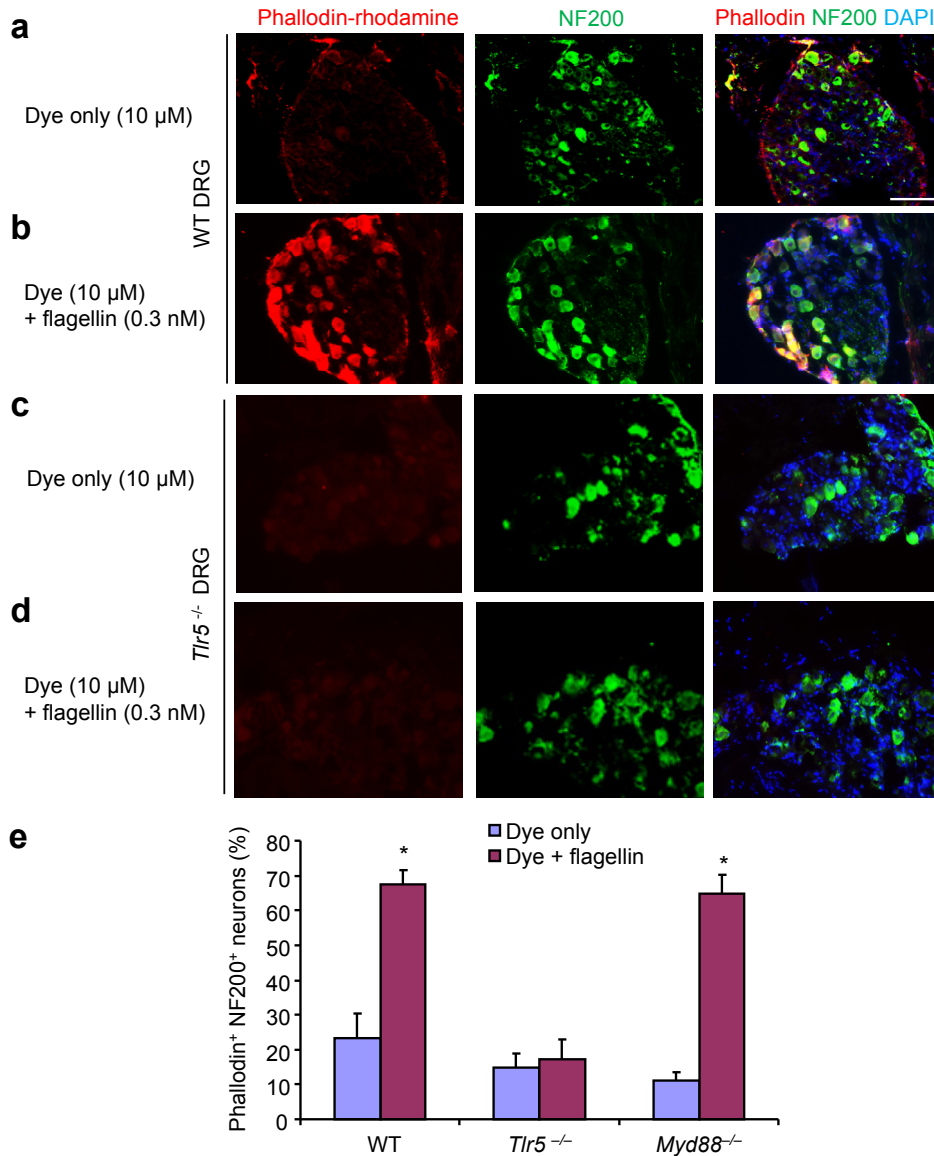

**Supplementary Fig. 6.** Flagellin/QX-314 treatment causes entry of phalloidin-rhodamine into large A-fiber DRG neurons via TLR5 activation. **(a-d)** Double labeling of phalloidin-rhodamine (red) and NF200 (green) in DRG sections of WT mice **(a,b)** and *Tlr5*<sup>-/-</sup> mice **(c,d)** after treatment of flagellin **(a,c)** and flagellin/QX-314 **(b,d)**. Whole mount DRGs were treated with 0.3 nM flagellin or 0.3 nM flagellin / 5 mM QX-314 for 10 min. After the treatment, the DRGs were fixed and processed for NF200 immunostaining and DAPI DNA staining (blue). Note that only flagellin/QX-314 co-application induces phalloidin entry into NF200-expressing neurons in WT but not *Tlr5*<sup>-/-</sup> mice. Scale, 100  $\mu$ m. **(e)** Percentage of phalloidin-rhodamine/NF200 double-labeled neurons following dye incubation with and without flagellin/QX-314 in WT, *Tlr5*<sup>-/-</sup> mice, and *Myd88*<sup>-/-</sup> mice. Note that phalloidin-rhodamine entry is blocked after *Tlr5* but not *Myd88* deficiency. \**P* < 0.05, *n* = 3 mice/group. All data were expressed as mean  $\pm$  s.e.m.



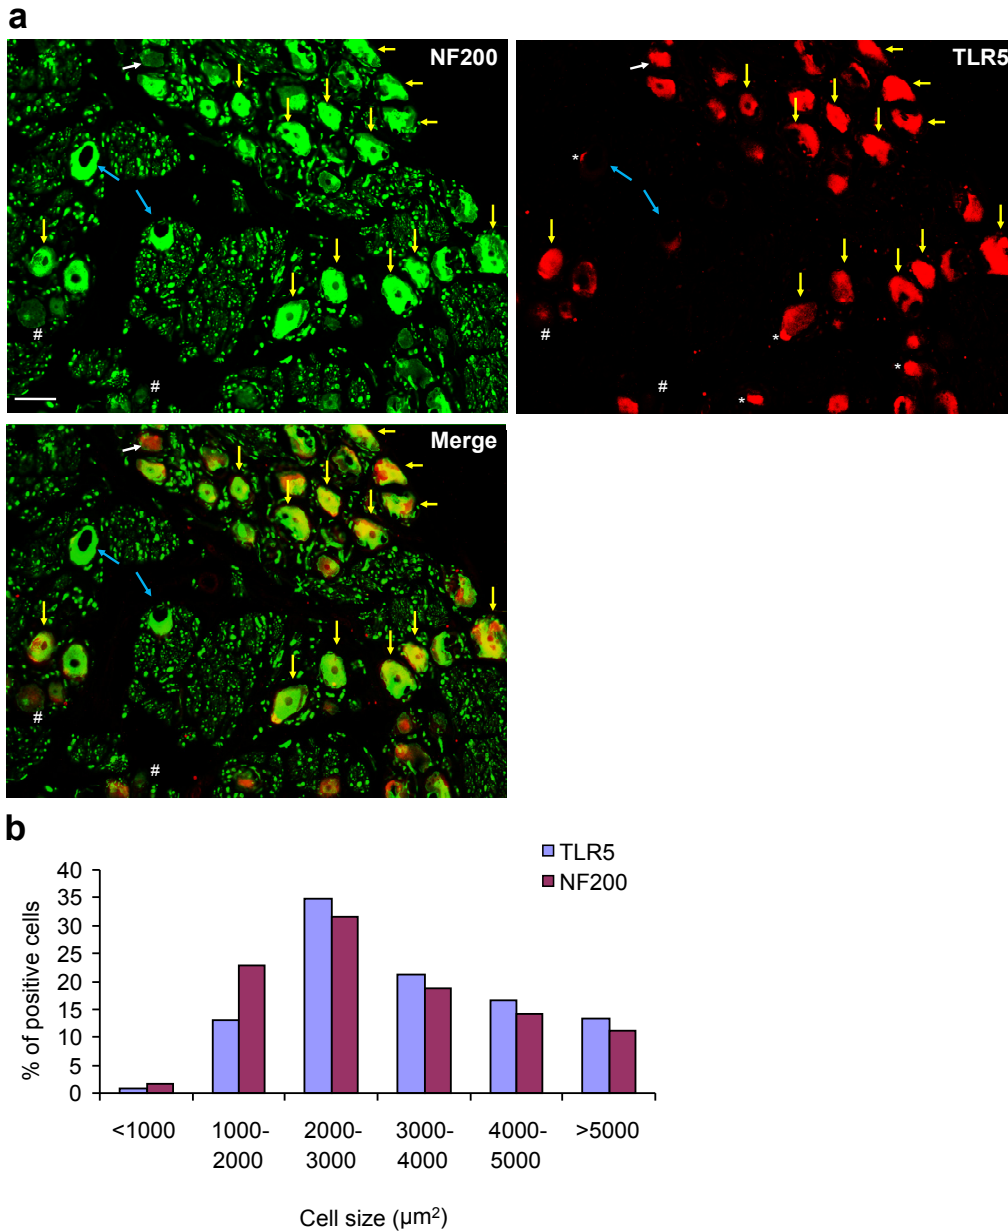

**Supplementary Fig. 7.** Co-localization of TLR5 with NF-200 in human DRG. **(a)** Double staining of TLR5 and NF200 in human L4 DRG section. Yellow, white, and blue arrows show double-labeled neurons, TLR5 single-labeled neurons, and NF200 single-labeled neurons, respectively. # denotes neurons that are TLR5- and NF200-negative. \* indicates possible artifacts related to autofluorescence. Scale, 100  $\mu\text{m}$ . **(b)** Size distribution of TLR5-IR and NF-200-IR neurons in human L4-L5 DRGs.

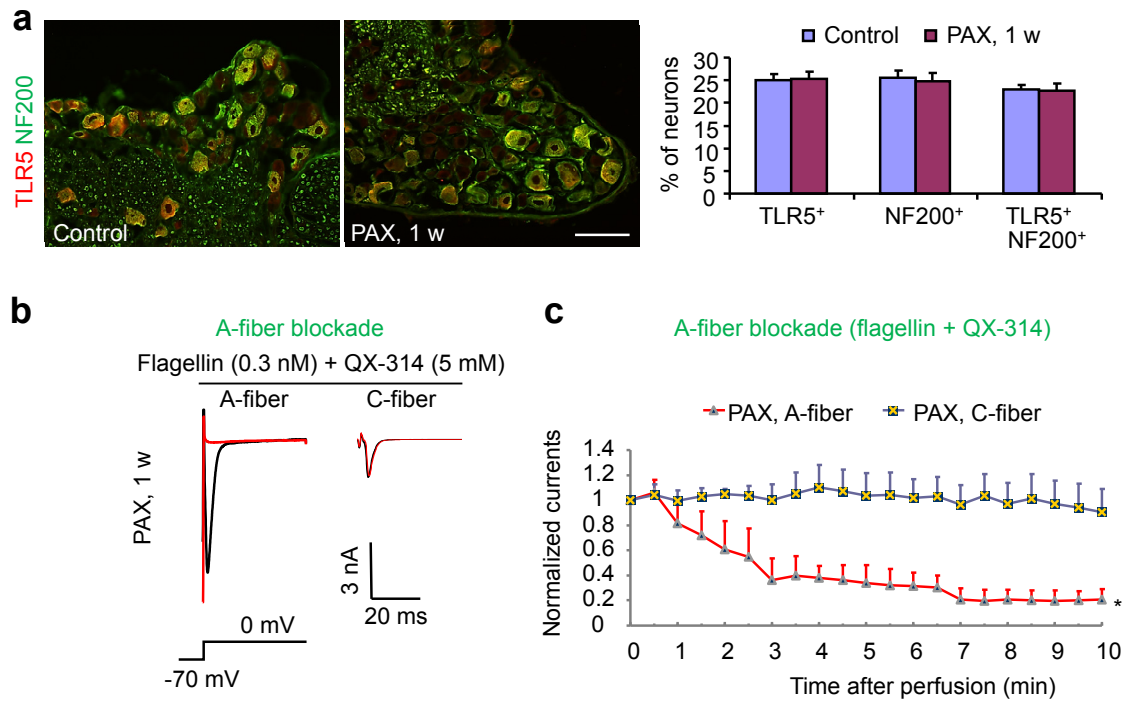

**Supplementary Fig. 8.** QX-314/flagellin treatment blocks A-fiber but not C-fiber activities in DRG neurons one week after paclitaxel (PAX) treatment. **(a)** Co-localization of TLR5 (red) and NF200 (green) in DRG sections of control mice and PAX-treated mice (1 w). Note that the percentage of DRG neurons expressing TLR5, NF200, and TLR5/NF200 is similar in control and PAX-treated mice.  $n = 4$  mice / group. Scale, 100  $\mu\text{m}$ . **(b)** Traces of transient sodium currents in C- and A-fiber neurons of WT mice, before and after the flagellin/QX-314 treatment. **(c)** Time course of sodium currents in C- ( $n = 5$ ) and A-fiber ( $n = 8$ ) neurons after the A-fiber blockade.  $*P < 0.05$ , two-way ANOVA. All data were expressed as mean  $\pm$  s.e.m.

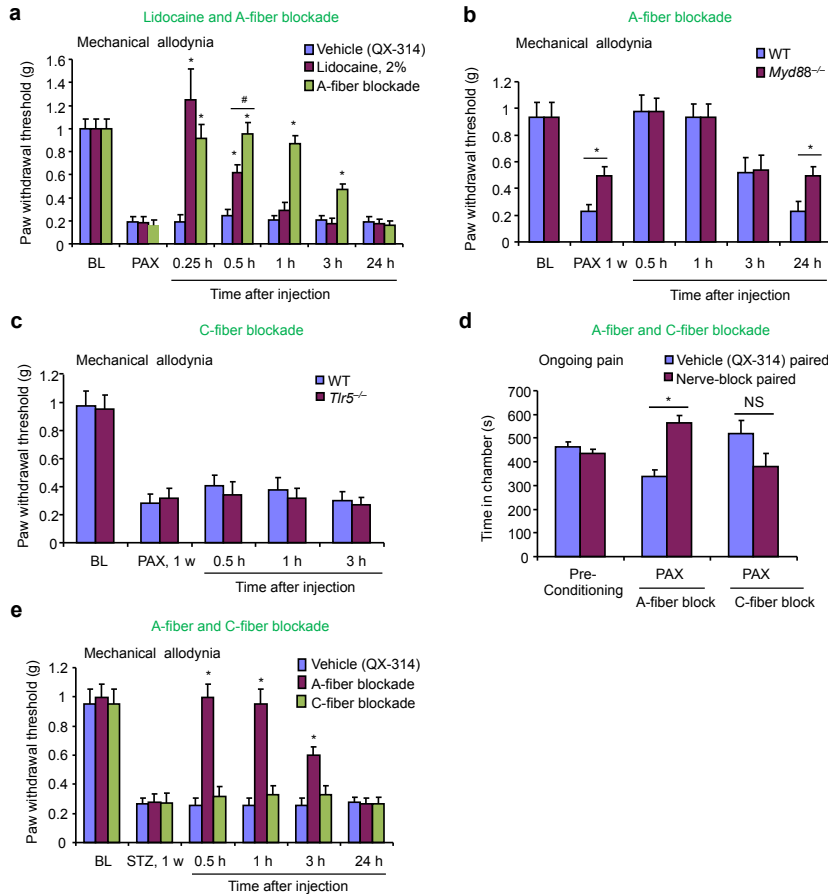

**Supplementary Fig. 9.** Effects of A-fiber blockade, C-fiber blockade, or lidocaine on paclitaxel (PAX)-induced mechanical allodynia and ongoing pain in WT, *Tlr5*<sup>-/-</sup>, *Myd88*<sup>-/-</sup> mice. **(a)** Comparison of the effects of flagellin/QX-314 (A-fiber block) and 2% lidocaine on PAX-induced mechanical allodynia in WT mice. Note that lidocaine only produces a very transient reversal of allodynia (< 1 h). Behavior was tested 15 min after lidocaine treatment to avoid lidocaine-evoked motor impairment (<10 min). \**P* < 0.05, vs. vehicle, #*P* < 0.05, two-way ANOVA followed by post-hoc Bonferroni test. *n* = 5 mice/group. **(b)** Reversal of PAX-induced mechanical allodynia by A-fiber blockade in *Myd88*<sup>-/-</sup> mice. PAX-induced mechanical allodynia is partially reduced after *Myd88* deletion. \**P* < 0.05, vs. vehicle, two-way ANOVA followed by post-hoc Bonferroni test. *n* = 5 mice/group. **(c)** No effects of C-fiber blockade on PAX-induced mechanical allodynia in WT and *Tlr5*<sup>-/-</sup> mice. *n* = 5 mice/group. **(d)** CPP shows that mice spend more time in A-fiber blockade (*n* = 7 mice) paired chamber. Note C-fiber blockade (*n* = 5 mice) fails to show significant effects on CPP. \**P* < 0.05, N.S, no significance. A-fiber and C-fiber blockade was induced by flagellin (0.3 μg) / QX-314 (0.2%) or capsaicin (10 μg) / QX-314 (0.2%), respectively, via intraplantar route. Lidocaine was also given via intraplantar injection. **(e)** Distinct effects of intraplantar A-fiber blockade vs. C-fiber blockade on STZ-induced mechanical allodynia. \**P* < 0.05, two-way ANOVA followed by post-hoc Bonferroni test. *n* = 5 mice/group. All data were expressed as mean ± s.e.m.

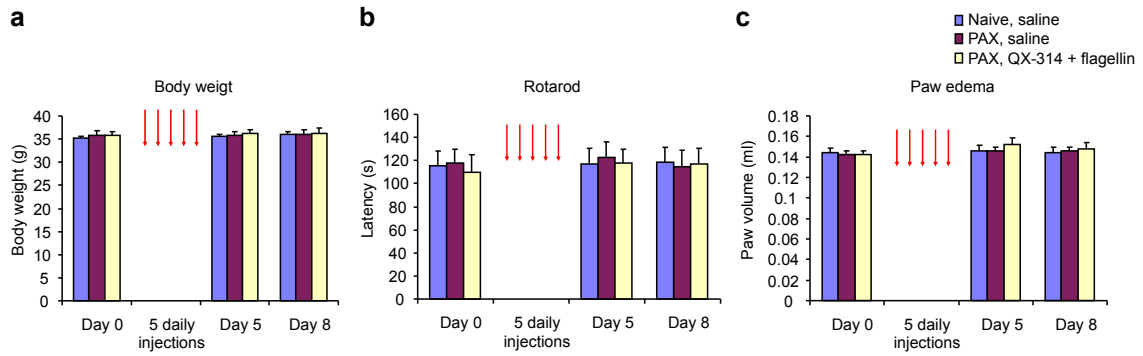

**Supplementary Fig. 10.** Effects of repeated intraplantar injections of flagellin (0.3  $\mu$ g) and QX-314 (0.2%) on body weight, motor function (evaluated by Rotarod test), and paw inflammation (assessed by paw volume) in naïve and paclitaxel (PAX)-treated mice. n=5 mice/group. All data were expressed as mean  $\pm$  s.e.m.

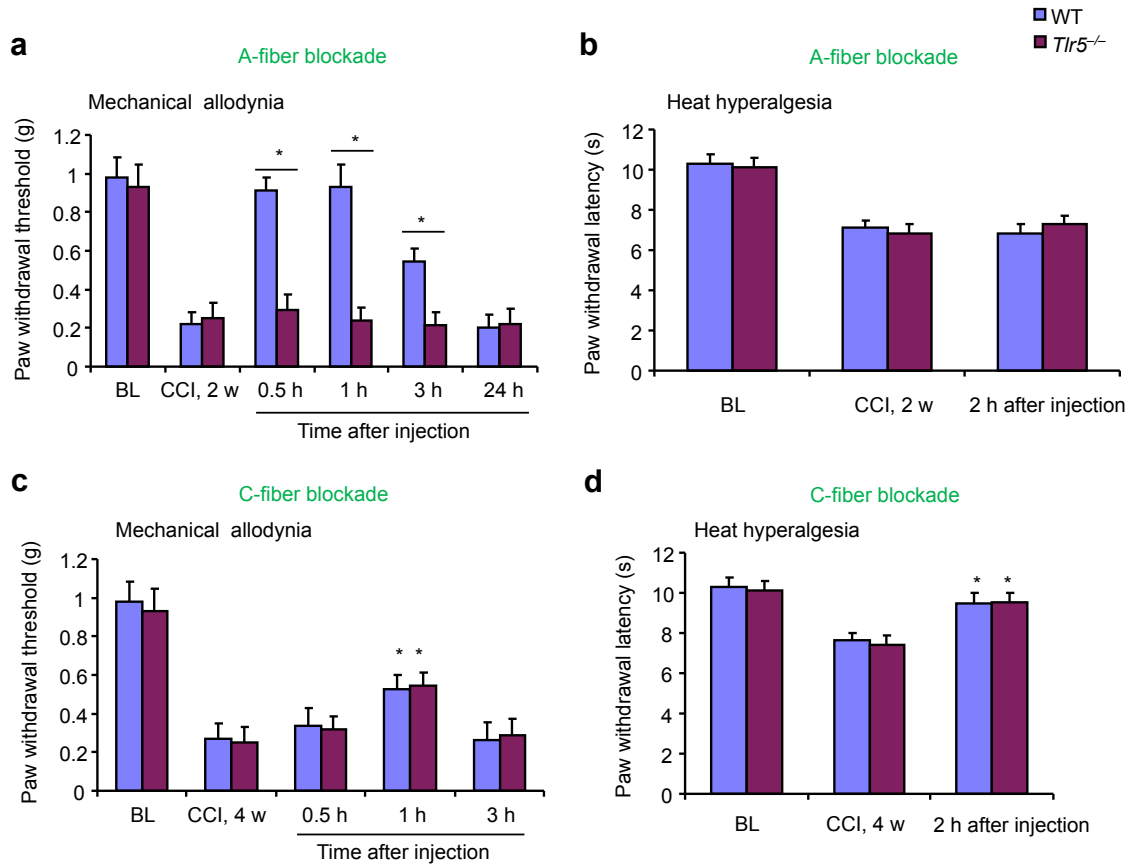

**Supplementary Fig. 11.** Distinct effects of A-fiber and C-fiber blockade on CCI-induced mechanical allodynia and heat hyperalgesia in WT and *Tlr5*<sup>-/-</sup> mice. **(a,b)** Reversal of CCI-induced mechanical allodynia **(a)** but not heat hyperalgesia **(b)** by A-fiber blockade in WT but not *Tlr5*<sup>-/-</sup> mice. \**P* < 0.05, two-way ANOVA followed by post-hoc Bonferroni test. *n* = 5 mice/group. **(c,d)** Effects of C-fiber block on CCI-induced mechanical allodynia **(c)** and heat hyperalgesia **(d)** in WT and *Tlr5*<sup>-/-</sup> mice. Note that C-fiber block produces complete reversal of CCI-induced heat hyperalgesia but only mild reversal of CCI-induced mechanical allodynia and the blocking effect is *Tlr5*-independent. \**P* < 0.05, two-way ANOVA followed by post-hoc Bonferroni test. *n* = 5 mice/group. A-fiber and C-fiber blockade was induced by flagellin (0.3 μg) / QX-314 (0.2%) or capsaicin (10 μg) / QX-314 (0.2%), respectively, via intraplantar route. All data were expressed as mean ± s.e.m.

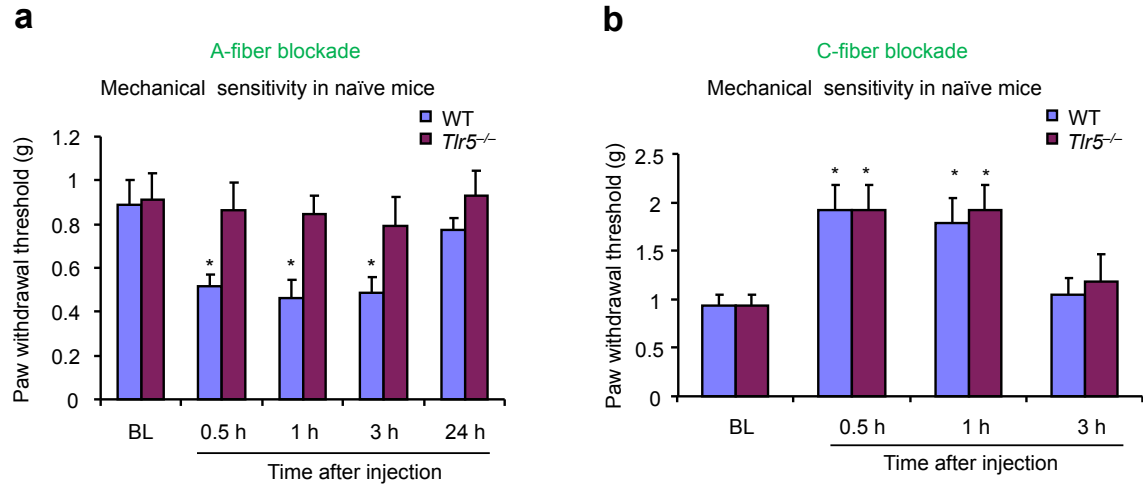

**Supplementary Fig. 12.** Different effects of intraplantar A-fiber blockade (**a**) and C-fiber blockade (**b**) on baseline mechanical sensitivity in naïve WT and *Tlr5*<sup>-/-</sup> mice. A-fiber blockade causes *Tlr5*-dependent mechanical hypersensitivity (allodynia). In contrast, C-fiber blockade causes *Tlr5*-independent mechanical hyposensitivity (analgesia) in naïve mice. A-fiber and C-fiber blockade was induced by flagellin (0.3  $\mu$ g) / QX-314 (0.2%) or capsaicin (10  $\mu$ g) / QX-314 (0.2%), respectively, via intraplantar route. \* $P < 0.05$ , compared to baseline (BL), two-way ANOVA followed by post-hoc Bonferroni test.  $n = 5$  mice/group. All data were expressed as mean  $\pm$  s.e.m.
